# Supplementary material
Source: PubMed Central journal article supplement (PMC2833081)
Supplement: 2009.015644_1.pdf [file 2009.015644_1.pdf]

# Combined modality treatment improves tumor control and overall survival in patients with early stage Hodgkin lymphoma: a systematic review

Christine Herbst,<sup>1</sup> Fareed A. Rehan,<sup>1</sup> Corinne Brilliant,<sup>1</sup> Julia Bohlius,<sup>2</sup> Nicole Skoetz,<sup>1</sup> Holger Schulz,<sup>1</sup> Ina Monsef,<sup>1</sup> Lena Specht,<sup>3</sup> and Andreas Engert<sup>1</sup>

<sup>1</sup>Department I of Internal Medicine, Cochrane Haematological Malignancies Group (CHMG), University Hospital Cologne, Germany; <sup>2</sup>Institute of Social and Preventive Medicine, University of Bern, Bern, Switzerland, and <sup>3</sup>Department of Oncology and Hematology, Rigshospitalet, University of Copenhagen, Copenhagen, Denmark

This paper contains a Supplementary Appendix. Funding: the review was funded by the German Ministry for Education and Research (BMBF) under grant number 01KG0815. The agency had no influence on the design, conduct, analysis, writing the paper nor on the decision to submit the paper for publication.

Manuscript received August 14, 2009. Revised version arrived September 17, 2009. Manuscript accepted September 17, 2009.

Correspondence: Andreas Engert, Department I of Internal Medicine, Cochrane Haematological Malignancies Group (CHMG), University Hospital Cologne, Kerpener Strasse 62, 50924 Cologne, Germany. E-mail: a.engert@uni-koeln.de

Citation: Herbst C, Rehan FA, Brilliant C, Bohlius J, Skoetz N, Schulz H, Monsef I, Specht L, and Engert A. Combined modality treatment improves tumor control and overall survival in patients with early stage Hodgkin lymphoma: a systematic review. *Haematologica* 2009. doi:10.3324/haematol.2009.015644

©2010 Ferrata Storti Foundation. This is an open-access paper.

Online Supplementary Table 1. Characteristics of trials included only in sensitivity analyses.

| Trial                                                                               | Patients                                                                         | Time of randomization | Treatments                                                     | Subgroup of early stage patients reported? | Median length of observation (years) | Overall survival                           | Tumor control                                      |
|-------------------------------------------------------------------------------------|----------------------------------------------------------------------------------|-----------------------|----------------------------------------------------------------|--------------------------------------------|--------------------------------------|--------------------------------------------|----------------------------------------------------|
| Laskar 2004                                                                         | All stages, age <70 years                                                        | In CR                 | 6 x ABVD vs. 6 x ABVD + (mainly) IF-RT                         | yes; stage I-II: CT: 44 CT+RT: 55          | 8                                    | CT: 98% CT+RT: 100%                        | CT: 94% CT+RT: 97%                                 |
| Nachman 2002                                                                        | Children with any stage of HL                                                    | In CR                 | For early stages: 4x COPP/ABV vs. 4x COPP/ABV + low dose IF-RT | yes; stage I-II: CT: 173 CT+RT: 189        | 3                                    | 100% in both groups                        | CT: 91%± 2.8 (SE) CT+RT: 97% ±1.7 (SE)             |
| O'Dwyer 1985                                                                        | stages IB to IIIA                                                                | Before treatment      | MOPP versus MOPP +RT                                           | no CT: 17 CT+RT : 16                       | 6                                    | CT: 2 patients died CT+RT: 3 patients died | CT: 4 patients relapsed CT+RT: 3 patients relapsed |
| Picardi 2007                                                                        | bulky HL with residual masses in CT that were PET negative at restaging after CT | In CR                 | 6x VEBEP versus 6x VEBEP + RT                                  | yes; CT: 52 CT+RT: 53                      | 5                                    | 100% in both groups                        | # of patients who relapsed: CT: 6/52 CT+RT: 0/53   |
| <i>Trials where the number of cycles of chemotherapy varies between trial arms.</i> |                                                                                  |                       |                                                                |                                            |                                      |                                            |                                                    |
| Kung 2006                                                                           | Children, PS I-IIIa                                                              | In CR or PR           | 6x MOPP/ABVD vs. 4x MOPP/ABVD + IF-RT                          | no (31% IIIA)                              | 8                                    | CT: 93.6%±3.9% CT+RT: 96.8%±2.7% p=0.79    | CT: 82.6%±5.9% CT+RT: 91.1%± 4.5% p=0.15           |
| Meyer 2005                                                                          | Early stage (I-IIA); absence of bulky disease                                    | Before treatment      | 4-6 x ABVD vs. 2 x ABVD + SN-RT                                | only early stage                           | 5                                    | HR =1.76 (0.62, 4.68)                      | HR=0.33 (0.14, 0.80)                               |

NR: not reported; ABVD: adriamycin, bleomycin, vinblastine, dacarbazine; COPP: cyclophosphamide, vincristine, procarbazine and prednisolone; MOPP: mechlorethamine, vincristine, procarbazine, prednisone; VEBEP: etoposide, epirubicin, bleomycin, cyclophosphamide, prednisone; RT: radiotherapy; IF-RT: involved-field radiotherapy; SN-RT: subtotal-nodal radiotherapy; CT: chemotherapy; OS: overall survival.
